# Supplementary material for: Adenosine 2A receptor and TIM3 suppress cytolytic killing of tumor cells via cytoskeletal polarization
Source: PubMed Central journal article supplement (PMC8748690; doi:10.1038/s42003-021-02972-8), 2022-01-10
Supplement: 42003_2021_2972_MOESM15_ESM.pdf [file 42003_2021_2972_MOESM15_ESM.pdf]

## Reporting Summary

Nature Research wishes to improve the reproducibility of the work that we publish. This form provides structure for consistency and transparency in reporting. For further information on Nature Research policies, see our [Editorial Policies](#) and the [Editorial Policy Checklist](#).

### Statistics

For all statistical analyses, confirm that the following items are present in the figure legend, table legend, main text, or Methods section.

n/a Confirmed

- The exact sample size ( $n$ ) for each experimental group/condition, given as a discrete number and unit of measurement
- A statement on whether measurements were taken from distinct samples or whether the same sample was measured repeatedly
- The statistical test(s) used AND whether they are one- or two-sided  
*Only common tests should be described solely by name; describe more complex techniques in the Methods section.*
- A description of all covariates tested
- A description of any assumptions or corrections, such as tests of normality and adjustment for multiple comparisons
- A full description of the statistical parameters including central tendency (e.g. means) or other basic estimates (e.g. regression coefficient) AND variation (e.g. standard deviation) or associated estimates of uncertainty (e.g. confidence intervals)
- For null hypothesis testing, the test statistic (e.g.  $F$ ,  $t$ ,  $r$ ) with confidence intervals, effect sizes, degrees of freedom and  $P$  value noted  
*Give  $P$  values as exact values whenever suitable.*
- For Bayesian analysis, information on the choice of priors and Markov chain Monte Carlo settings
- For hierarchical and complex designs, identification of the appropriate level for tests and full reporting of outcomes
- Estimates of effect sizes (e.g. Cohen's  $d$ , Pearson's  $r$ ), indicating how they were calculated

*Our web collection on [statistics for biologists](#) contains articles on many of the points above.*

### Software and code

Policy information about [availability of computer code](#)

Data collection

Image acquisition  
Volocity, v6.3  
Leica LASX, v3.7

## Data analysis

Flow Cytometry  
FlowJo, v 10.7.1

Image analysis  
Metamorph, v7.7  
Fiji/ImageJ, v2.1.0  
Incucyte Zoom, v2018A

Statistics RStudio v1.0.143 (PCA), SPSS v26, Graphpad Prism v7

## custom additions:

A custom-written script to execute the principal component analysis of inhibitory receptor expression is available at GitHub: <https://github.com/ge8793/rencapca>.

To obtain measurements of SIL density and spheroid dead volumes, raw data was pre-processed and semi-automatically analysed using a custom-written Cancer Segmentation workflow for the Fiji (52) plugin, MIA (v0.9.26) and its MIA\_MATLAB (v1.1.1) package, available at Github via Zenodo: <http://doi.org/10.5281/zenodo.2656513> and <http://doi.org/10.5281/zenodo.4769615>, respectively. The corresponding .mia workflow files are available at <https://doi.org/10.5281/zenodo.5511888>.

For manuscripts utilizing custom algorithms or software that are central to the research but not yet described in published literature, software must be made available to editors and reviewers. We strongly encourage code deposition in a community repository (e.g. GitHub). See the Nature Research [guidelines for submitting code & software](#) for further information.

## Data

Policy information about [availability of data](#)

All manuscripts must include a [data availability statement](#). This statement should provide the following information, where applicable:

- Accession codes, unique identifiers, or web links for publicly available datasets
- A list of figures that have associated raw data
- A description of any restrictions on data availability

Two large data sets, the flow cytometry data underpinning the principal component analysis to determine inhibitory receptor expression upon A2aR blockade in figure 2 and the spheroid imaging data in figure 6, are accessible through an open data repository of the University of Bristol at <https://data.bris.ac.uk/data/> under DOI [doi.org/10.5523/bris.11ocsor59owa32ihsxm0qzj3s](https://doi.org/10.5523/bris.11ocsor59owa32ihsxm0qzj3s). All other source data are provided as supplementary information and corresponding raw imaging data will be made available upon request.

## Field-specific reporting

Please select the one below that is the best fit for your research. If you are not sure, read the appropriate sections before making your selection.

Life sciences  Behavioural & social sciences  Ecological, evolutionary & environmental sciences

For a reference copy of the document with all sections, see [nature.com/documents/nr-reporting-summary-flat.pdf](https://nature.com/documents/nr-reporting-summary-flat.pdf)

## Life sciences study design

All studies must disclose on these points even when the disclosure is negative.

|                 |                                                                                                                                                                                                                                                                                                                                                                                                                                                               |
|-----------------|---------------------------------------------------------------------------------------------------------------------------------------------------------------------------------------------------------------------------------------------------------------------------------------------------------------------------------------------------------------------------------------------------------------------------------------------------------------|
| Sample size     | The Power of in vivo experiments was designed to reach >80%. Experimental group size was determined using the equation: $n = (2 / (\text{standardized difference}^2)) \times cp, \text{power}$ , where n = sample size per group determined using the formula, d = standardized difference = measurable difference in tumor volume / standard deviation, cp,power = constant for $p < 0.01$ and power at 80% defined using standard Altman's Nomogram = 11.7. |
| Data exclusions | Mice were censored if tumors were < maximal allowable tumor size (MATS) or if culled for reasons other than tumor size (such as ulceration). Mice bearing tumors > MATS were culled and recorded as dead. Mice were excluded if the tumors didn't grow >3 x 3mm in the first place                                                                                                                                                                            |
| Replication     | In vivo experiments were carried out over 4 replicates. The direction of effect was the same in all experiments. There was some variation in the magnitude of effect, in line with what is expected in in vivo tumor systems. In vitro experiments were carried out over three experiments and findings were successfully repeated, the range of values is shown in graphs using one point to represent each individual.                                      |
| Randomization   | Mice were allocated randomly into experimental groups by assigning a number to each individual and using a random number generator. Cages contained multiple experimental groups to reduce cage effects.                                                                                                                                                                                                                                                      |
| Blinding        | Two out of the four in vivo experimental repeats were carried out double blinded. A person independent to the study made up and labelled the drug reagents as A B and C. One technician assigned mice to groups A, B and C and administered reagents. Another technician measured tumors and was blind to both drug and mouse identity.                                                                                                                       |

## Reporting for specific materials, systems and methods

## Materials & experimental systems

## Methods

| n/a                                 | Included in the study                                           |
|-------------------------------------|-----------------------------------------------------------------|
| <input type="checkbox"/>            | <input checked="" type="checkbox"/> Antibodies                  |
| <input type="checkbox"/>            | <input checked="" type="checkbox"/> Eukaryotic cell lines       |
| <input checked="" type="checkbox"/> | <input type="checkbox"/> Palaeontology and archaeology          |
| <input type="checkbox"/>            | <input checked="" type="checkbox"/> Animals and other organisms |
| <input checked="" type="checkbox"/> | <input type="checkbox"/> Human research participants            |
| <input checked="" type="checkbox"/> | <input type="checkbox"/> Clinical data                          |
| <input checked="" type="checkbox"/> | <input type="checkbox"/> Dual use research of concern           |

| n/a                                 | Included in the study                              |
|-------------------------------------|----------------------------------------------------|
| <input checked="" type="checkbox"/> | <input type="checkbox"/> ChIP-seq                  |
| <input type="checkbox"/>            | <input checked="" type="checkbox"/> Flow cytometry |
| <input checked="" type="checkbox"/> | <input type="checkbox"/> MRI-based neuroimaging    |

## Antibodies

### Antibodies used

For flow cytometry:

FcBlock no azide (for blockade of Fc receptors) 2.4G2 BD Biosciences 1:50 RRID:AB\_2870673  
 CD8a FITC 53-6.7 BD Bioscience 1:100 RRID:AB\_394569  
 CD8b PeCy7 YTS156.7.7 Biolegend 1:200 RRID:AB\_2562777  
 CD4 AF700 CK1.5 Biolegend 1:100 RRID:AB\_493698  
 CD39 PerCP-Cy5.5 24DMS1 eBioscience 1:100 discontinued  
 CD73 BV605 TY/11.8 Biolegend 1:100 RRID:AB\_2561528  
 TIM3 PE B8.2C12 Biolegend 1:100 RRID:AB\_1626177  
 TIM3 BV605 RMT3-23 Biolegend 1:100 RRID:AB\_2616907  
 TIGIT APC 1G9 Biolegend 1:100 RRID:AB\_10962572  
 LAG3 PeCy7 C9B7W eBioscience 1:200 discontinued  
 PD1 BV785 29F.1A12 Biolegend 1:200 RRID:AB\_2563680  
 TCRb AF647 H57-597 Biolegend 1:200 RRID:AB\_493346  
 Thy1.1 FITC OX-7 BD Bioscience 1:100 RRID:AB\_395588  
 Thy1.1 PerCP-Cy5.5 OX-7 Biolegend 1:100 RRID:AB\_961438  
 CEACAM1 APC CC1 Biolegend 1:100 RRID:AB\_2632612

For blocking and T cell priming

TIM3 no azide (for in vitro/in vivo blockade) RMT3-23 BioXcell In Vivo mAb in vivo: 100µg/mouse in vitro: 10µg/ml RRID:AB\_10949464  
 Isotype control for anti-TIM3 Rat IgG2a 2A3 no azide (for in vivo/in vitro blockade) BioXcell In Vivo mAb in vivo: 100µg/mouse in vitro: 10µg/ml RRID:AB\_1107769  
 CD8 no azide (for in vivo depletion) 53-5.8 BioXcell InVivoMAb 100µg/mouse RRID:AB\_2687706  
 Thy1.1 no azide (for in vivo depletion) 19E12 BioXcell InVivoMAb 250µg/mouse RRID:AB\_2687700  
 CD3e no azide (for in vitro priming) 145-2C11 BioXcell InVivoMAb 10µg/ml RRID:AB\_1107634  
 CD28 no azide (for in vitro priming) 37.51 BioXcell InVivoMAb 1µg/ml RRID:AB\_1107624

For immunohistochemistry:

FcBlock no azide (for blockade of Fc receptors) 2.4G2 BD Biosciences 1:50 RRID:AB\_2870673  
 CD8a no azide 53-6.7 Biolegend 1:500 RRID:AB\_312741  
 Rabbit H+L AF488 Life Technologies 1:1000 RRID:AB\_143165  
 Rabbit H+L AF405 Life Technologies 1:1000 RRID:AB\_221605  
 Rat IgG2a,k Biolegend 1:500 RRID:AB\_326523  
 Rat IgG H+L AF594 ThermoFisher 1:2000 RRID:AB\_141374  
 FOXP3 no azide FJK-16S ThermoFisher 1:100 RRID:AB\_467575  
 FOXP3 APC FJK-16S ThermoFisher 1:40 RRID:AB\_469457  
 Thy1.1 FITC OX-7 BD Bioscience 1:100 RRID:AB\_395588  
 Isotype control for Thy1.1 Mouse IgG1,k FITC BD Bioscience 1:100 RRID:AB\_395505  
 CD19 (dump) BV510 6D5 Biolegend 1:100 RRID:AB\_2562136  
 TCRb SB645 H57-597 ThermoFisher 1:200 RRID:AB\_2723704  
 CD4 PE-Cy5.5 RM4-5 ThermoFisher 1:3000 RRID:AB\_1121830  
 CD8b PE-Cy5 H35-17.2 ThermoFisher 1:3000 RRID:AB\_657770  
 CD25 VioBright-FITC 7D4 Miltenyi 1:200 RRID:AB\_2784091  
 CD73 BV605 TY/11.8 Biolegend 1:100 RRID:AB\_2561528  
 CD39 PerCP-eFluor710 24DMS1 ThermoFisher 1:100 RRID:AB\_10717953

### Validation

Depletion antibodies were validated as illustrated in supplementary data.

In vivo blocking anti-TIM3 monoclonal antibodies were used in protocols according to published information (sources referenced in the methods in the text).

Validation of the antibodies for use in flow cytometry or immunohistochemistry in mice is available on the manufacturer's (listed

## Eukaryotic cell lines

Policy information about [cell lines](#)

|                                                                      |                                                                                                                                                                                                                              |
|----------------------------------------------------------------------|------------------------------------------------------------------------------------------------------------------------------------------------------------------------------------------------------------------------------|
| Cell line source(s)                                                  | Murine Renal Carcinoma cell line (RRID:CVCL_2174), ATCC<br>Phoenix retrovirus-producing cell line (RRID:CVCL_H717), Nolan laboratory, Stanford University                                                                    |
| Authentication                                                       | Murine Renal Carcinoma cell line: staining for MHCI, influenza hemagglutinin neoantigen, ICAM-1, susceptibility to neoantigen-specific killing<br>Phoenix retrovirus-producing cell line: production of MMLV viral particles |
| Mycoplasma contamination                                             | Tested by PCR                                                                                                                                                                                                                |
| Commonly misidentified lines<br>(See <a href="#">ICLAC</a> register) | N/A                                                                                                                                                                                                                          |

## Animals and other organisms

Policy information about [studies involving animals](#); [ARRIVE guidelines](#) recommended for reporting animal research

|                         |                                                                                                                                                                                                 |
|-------------------------|-------------------------------------------------------------------------------------------------------------------------------------------------------------------------------------------------|
| Laboratory animals      | Thy1.1+/- CL4 TCR-transgenic mice [RRID: IMSR_JAX:005307]<br>Thy1.2+/- BALB/c, (Charles River, Oxford, UK)                                                                                      |
| Wild animals            | N/A                                                                                                                                                                                             |
| Field-collected samples | N/A                                                                                                                                                                                             |
| Ethics oversight        | All mouse experiments were compliant with UK Home Office Guidelines under PPL 30/3024 to DJM as reviewed by the University of Bristol AWERB (Animal welfare and ethical review body) committee. |

Note that full information on the approval of the study protocol must also be provided in the manuscript.

## Flow Cytometry

### Plots

Confirm that:

- The axis labels state the marker and fluorochrome used (e.g. CD4-FITC).
- The axis scales are clearly visible. Include numbers along axes only for bottom left plot of group (a 'group' is an analysis of identical markers).
- All plots are contour plots with outliers or pseudocolor plots.
- A numerical value for number of cells or percentage (with statistics) is provided.

### Methodology

|                           |                                                                                                                                                                                                                                                                                                                                                                                                                                                                                                                                                                                                                                                                                                                                                                                                                                                                                                                |
|---------------------------|----------------------------------------------------------------------------------------------------------------------------------------------------------------------------------------------------------------------------------------------------------------------------------------------------------------------------------------------------------------------------------------------------------------------------------------------------------------------------------------------------------------------------------------------------------------------------------------------------------------------------------------------------------------------------------------------------------------------------------------------------------------------------------------------------------------------------------------------------------------------------------------------------------------|
| Sample preparation        | CTL or TILs, purified as described in the methods section, were resuspended in PBS at a concentration of 1 million cells/1 ml. 500,000 - 1000000 cells for each condition were placed into a polystyrene FACS tube (Corning). Cells were centrifuged and resuspended in 100 µl PBS per tube with 1 µl/100 µl Zombie Aqua or Zombie Near Infrared Fixable Live Cell Detection reagent (Biolegend). Tubes were incubated for 15 minutes in the dark at room temperature. Cells were washed in 3 ml FACS buffer and resuspended in 100 µl per tube FcBlock (BDBiosciences) for 15 minutes at 4°C. Cells were washed in 3 ml FACS buffer, pelleted and resuspended in 100 µl FACS buffer per tube with antibody at the required concentration. Cells were incubated for 30 minutes at 4°C. Cells were washed in 3 ml FACS buffer to remove excess antibody before being fixed in 1% paraformaldehyde and analysed. |
| Instrument                | Fortessa X20, BD Influx cell sorter                                                                                                                                                                                                                                                                                                                                                                                                                                                                                                                                                                                                                                                                                                                                                                                                                                                                            |
| Software                  | FlowJo (Treestar), v10.7.1                                                                                                                                                                                                                                                                                                                                                                                                                                                                                                                                                                                                                                                                                                                                                                                                                                                                                     |
| Cell population abundance | For tumour samples, 12-25% of cells are expected to fall into the lymphocyte gate, of which 50-85% are single, live cells. Sample collection is set so that 10,000 events in the lymphocyte gate (4% of the total 250,000 cell sample) is collected, samples were not considered valid if at least 10,000 CD8+ lymphocytes were not available.                                                                                                                                                                                                                                                                                                                                                                                                                                                                                                                                                                 |

Gating strategy

Boundaries between positive and negative populations were defined using a fluorescence minus one control sample for every stain included in each analysis. This is especially important, as co-inhibitory receptors do not split into positive and negative expression but low, intermediate and high expression on a continuum, therefore populations cannot be accurately defined without FMO controls. The initial FSC/SSC voltages were set to place lymphocytes in the bottom left quadrant of the plots as shown in gating strategy.

Tick this box to confirm that a figure exemplifying the gating strategy is provided in the Supplementary Information.
